# Supplementary material for: Preparation, Antimicrobial Activity and Docking Study of Vanadium Mixed Ligand Complexes Containing 4-Amino-5-hydrazinyl-4H-1,2,4-triazole-3-thiol and Aminophenol Derivatives
Source: MDPI journal article supplement (doi:10.3390/pr9061008), 2021-06-07
Supplement: s1 [file s1]

## Supporting materials

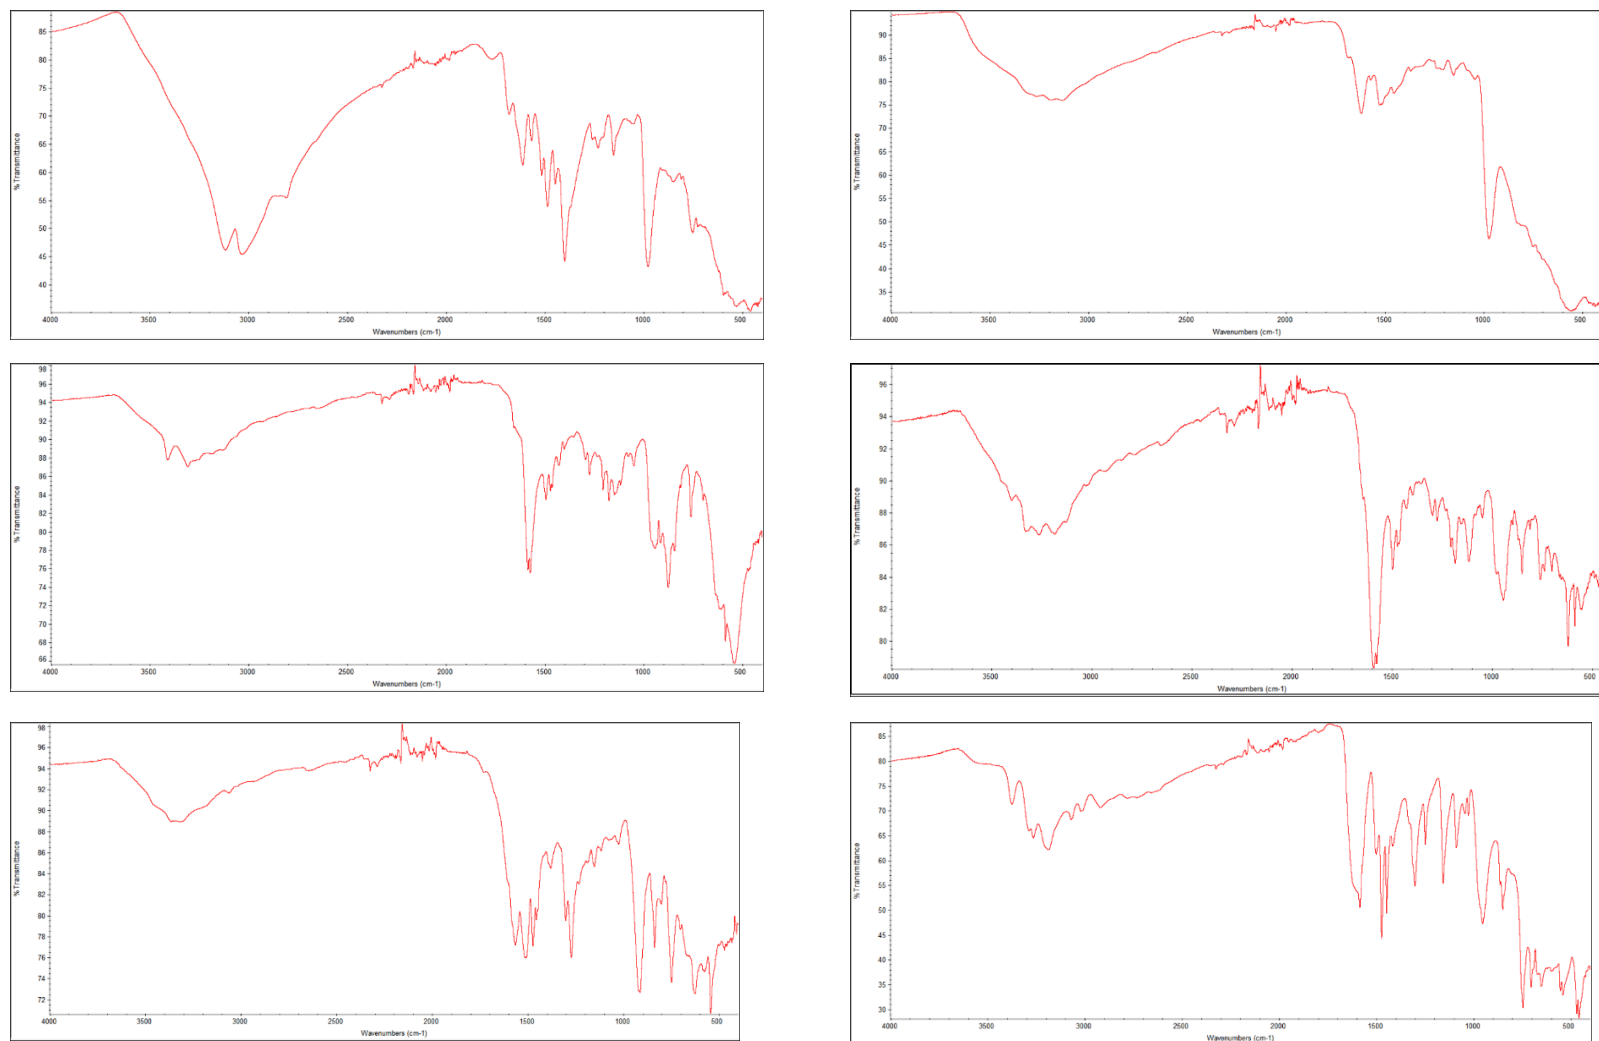

Fig. S1. IR spectrum for **(1-6)** complexes.

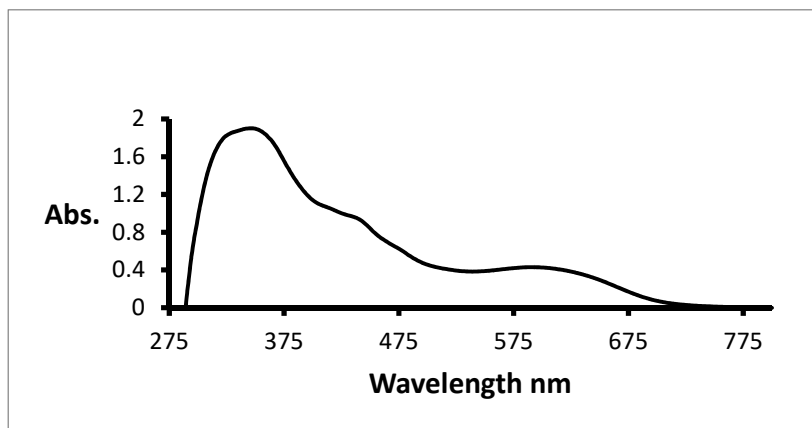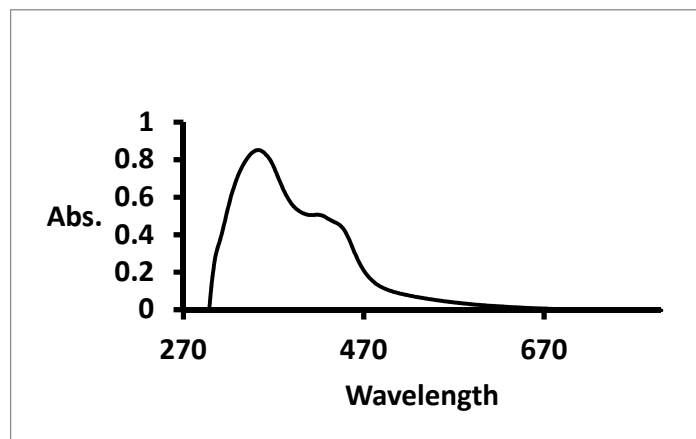

Fig. S2. The electronic spectrum of (1 and 4) complex.

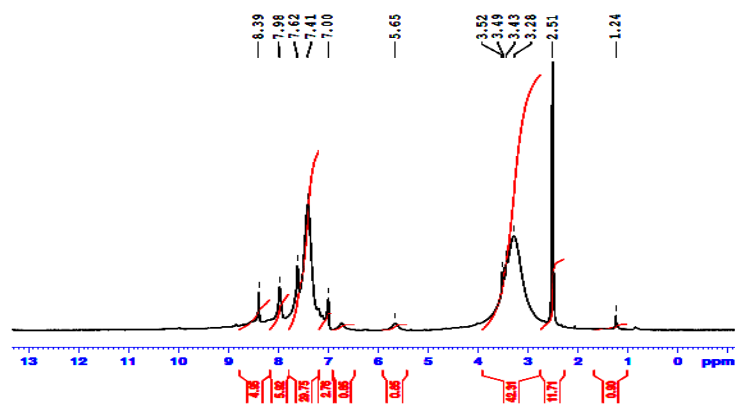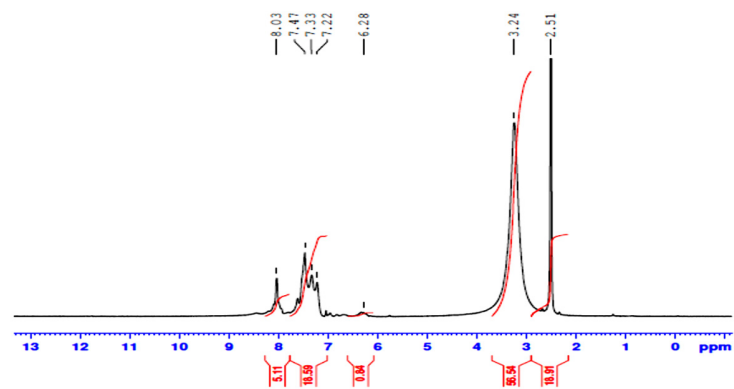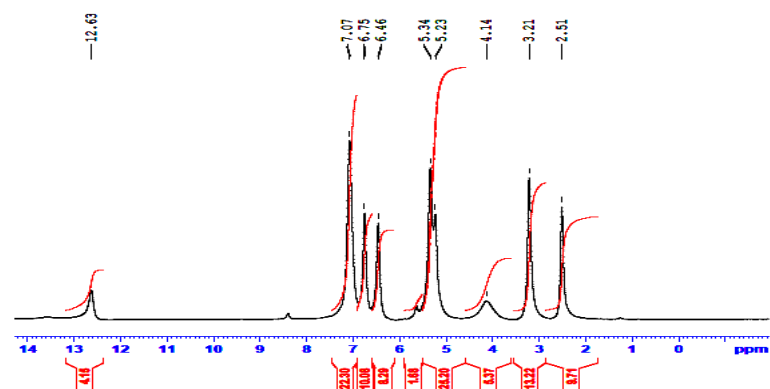

Figure S3: <sup>1</sup>H NMR spectrum of complexes (1-3).

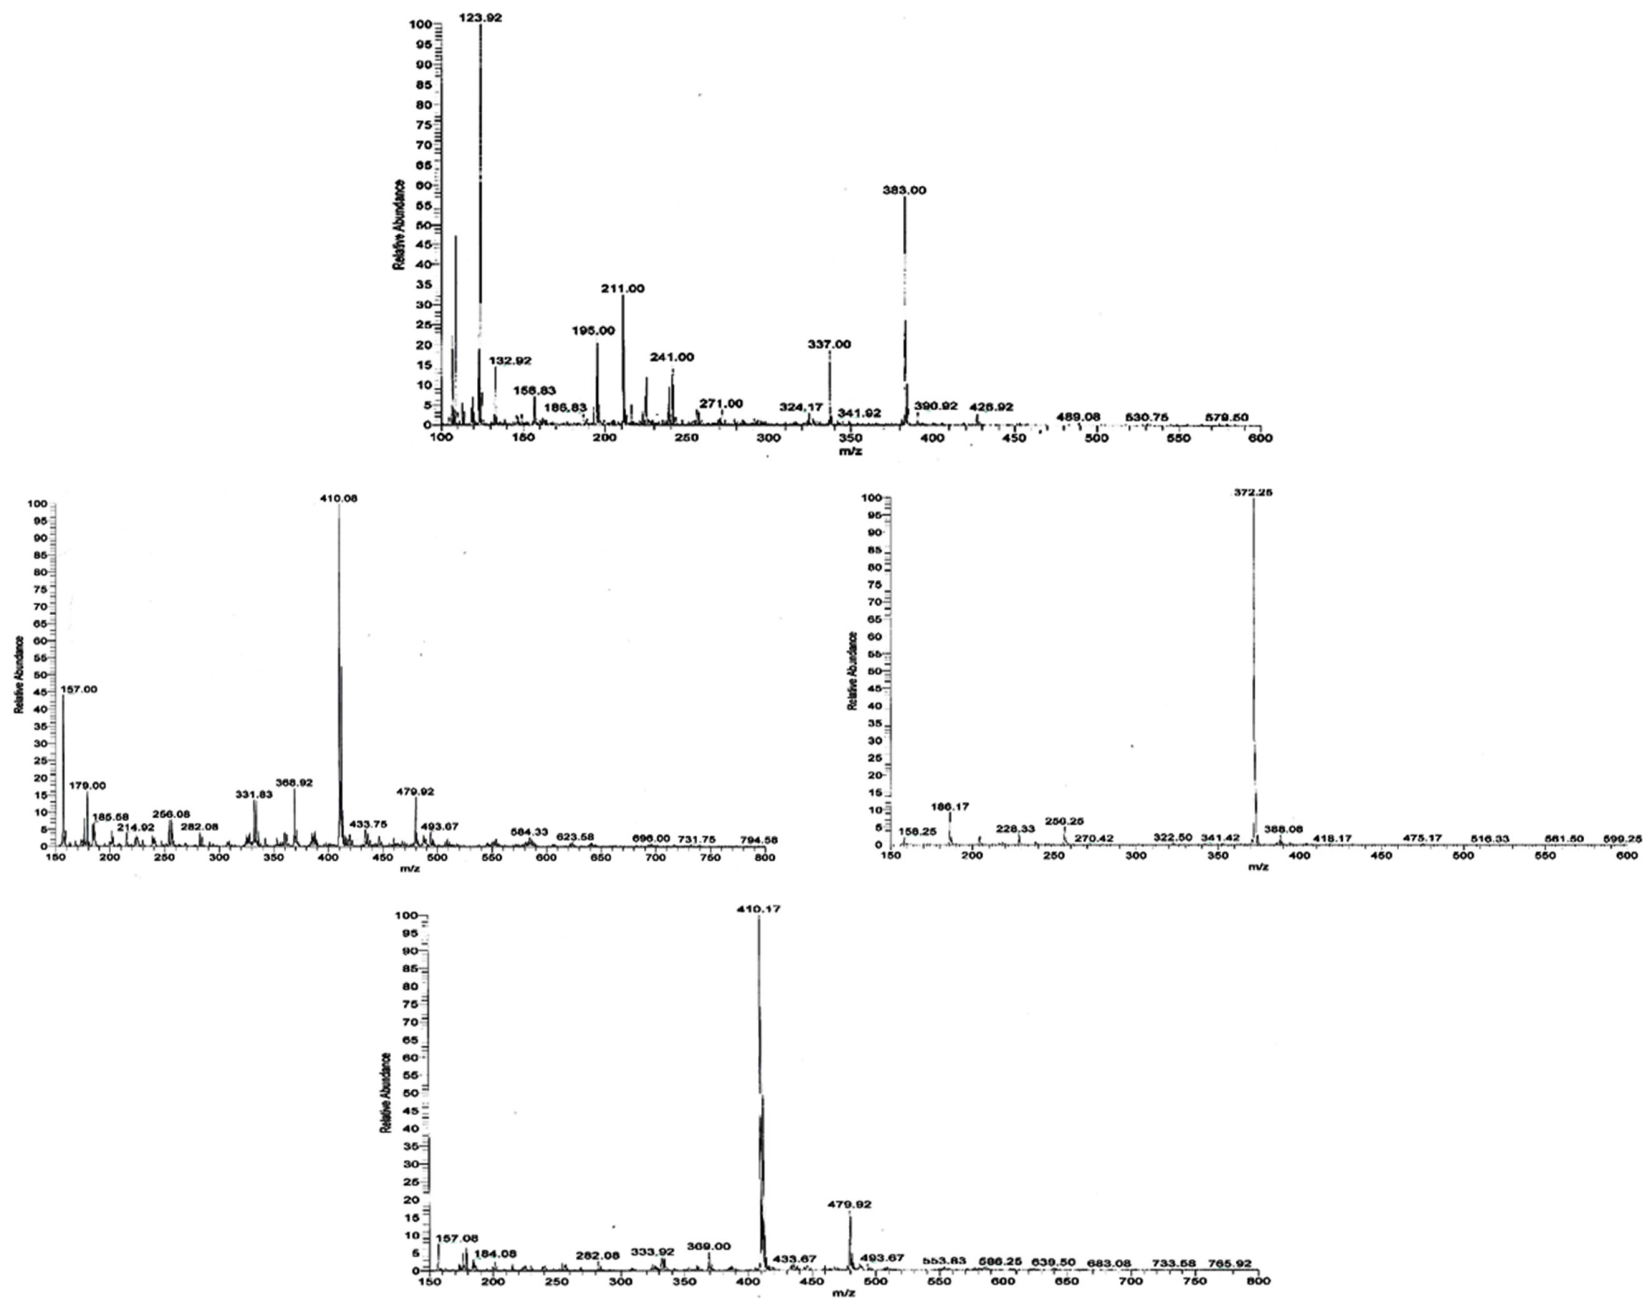

Figure S.4: Mass spectra for (1,3,5,6) complexes.

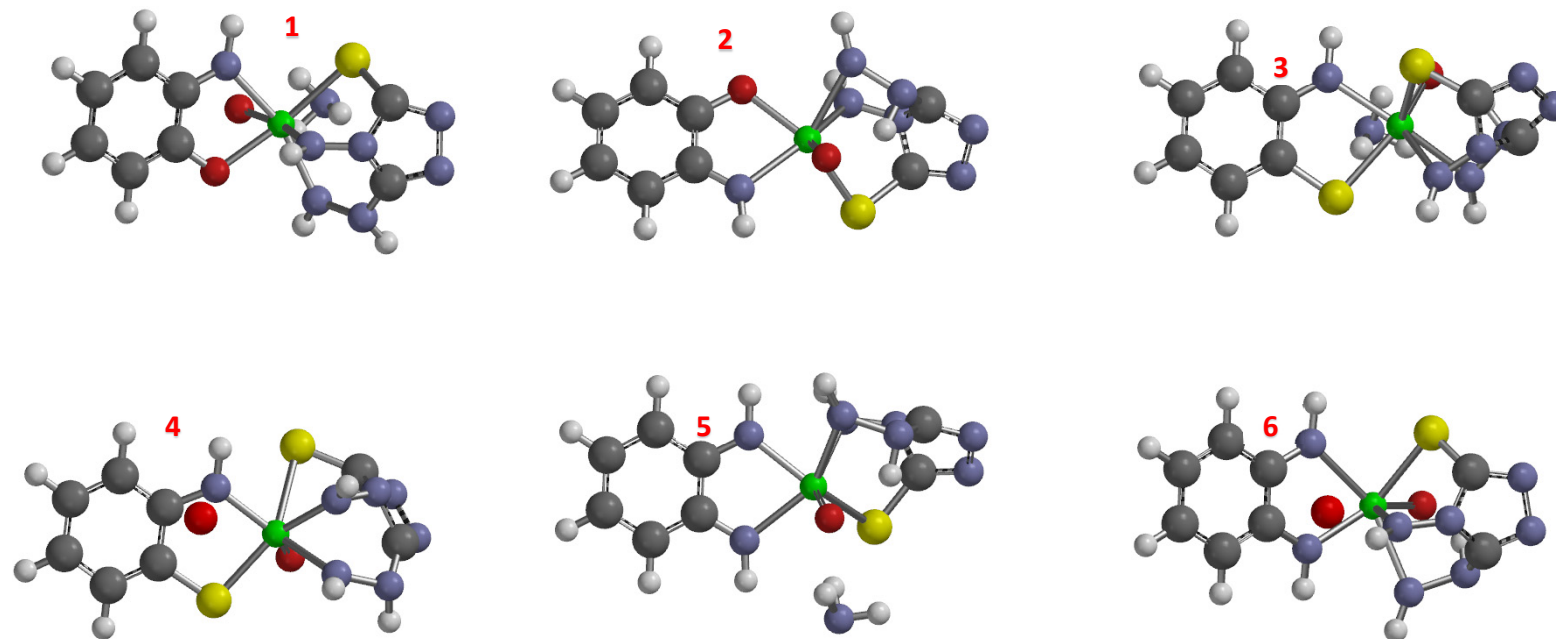

Figure S5: optimization geometry of tested complexes (1-6) at DFT/ **B3LYP/6-311G++(d,p)**.

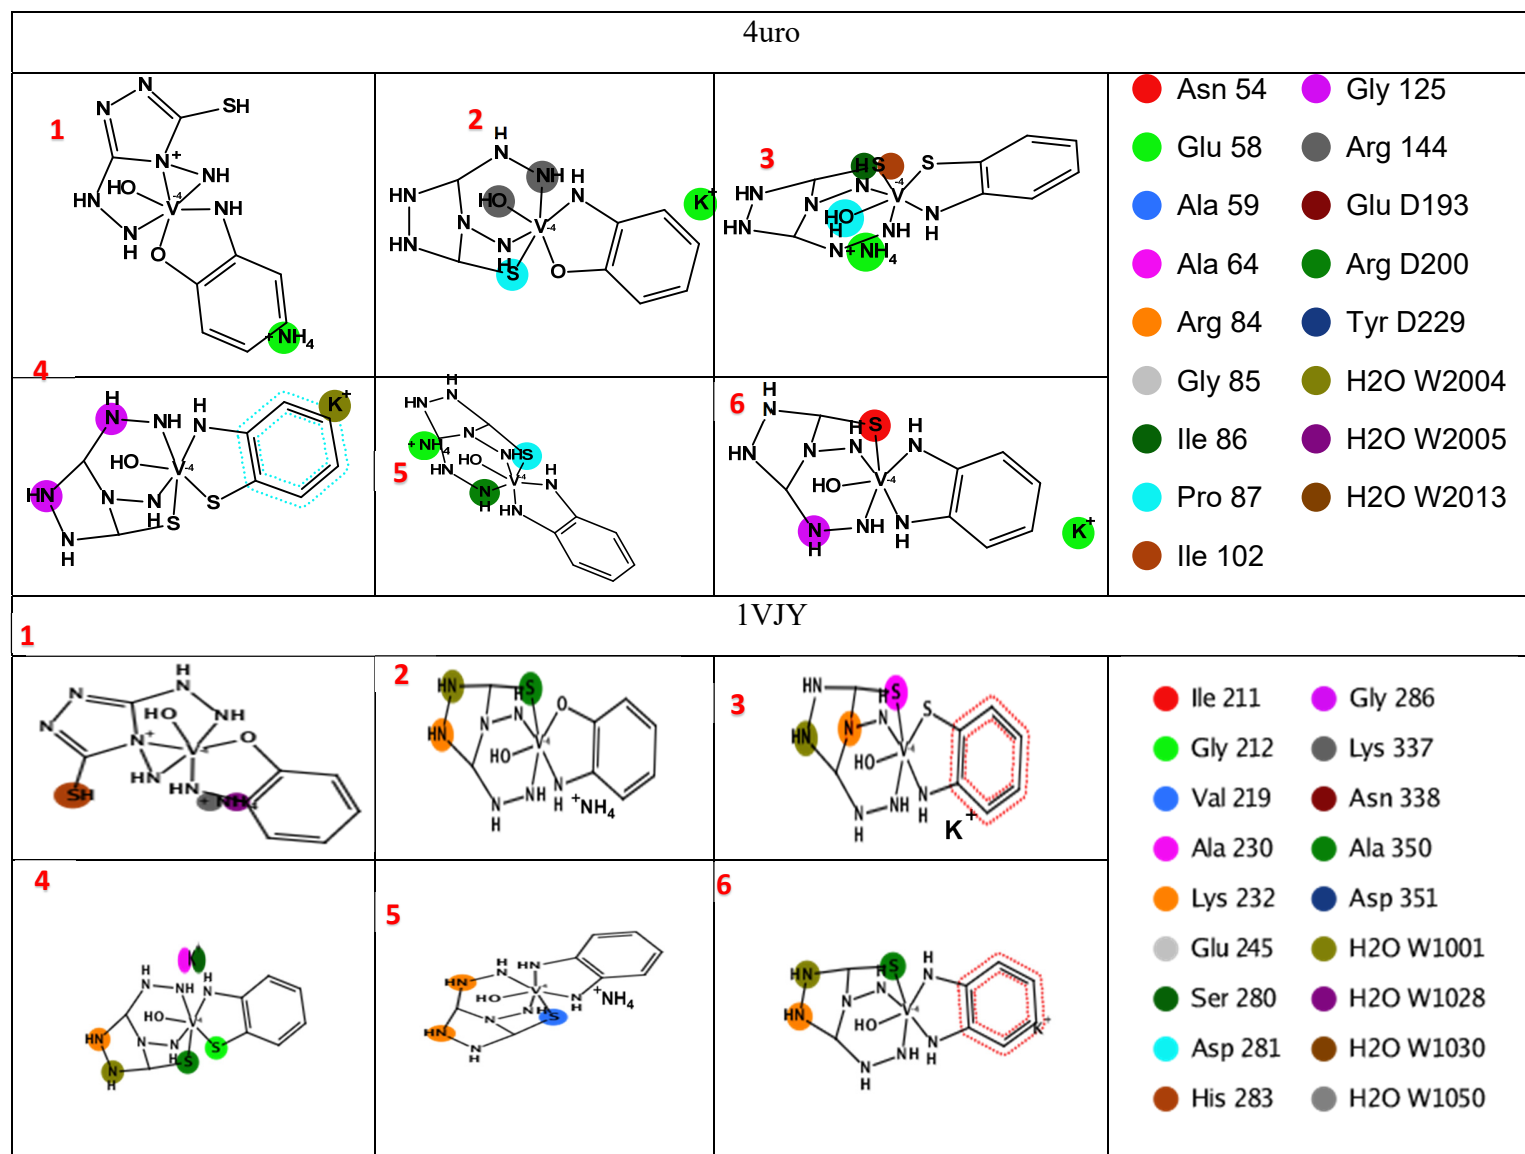

Figure S. 6: Schematic interactions between ligands and proteins 4uro and 1VJY using protein-ligand interaction fingerprint tools.

**Table S 1:** The elemental analysis data and molar conductance measurements of the Vanadium (V) Complexes.

| Compound                  | Mol. Formula   | Yield | Mol. Wt. | Cald(Found)%     |                |                  |                  |                  | Molar conductance<br>(ohm-1 cm2 mol-1) |
|---------------------------|----------------|-------|----------|------------------|----------------|------------------|------------------|------------------|----------------------------------------|
|                           |                |       |          | C                | H              | N                | O                | S                |                                        |
| NH4[VO(L1)(L2)]2.5H2O (1) | C8H22N9SO3.5V  | 80%   | 383.3    | 25.07<br>(25.25) | 5.79<br>(5.93) | 32.90<br>(32.73) | 14.57<br>(14.26) | 8.36<br>(8.52)   | 110.5                                  |
| K[VO(L1)(L2)]1.5H2O (2)   | C8H16N8SO2.5VK | 78%   | 386.35   | 24.87<br>(24.96) | 4.17<br>(4.34) | 29.01<br>(29.35) | 10.31<br>(10.52) | 8.30<br>(8.45)   | 95.3                                   |
| NH4[VO(L1)(L3)]H2O<br>(3) | C8H22N8SO6V    | 85%   | 409.29   | 23.47<br>(23.64) | 5.42<br>(5.53) | 27.38<br>(27.56) | 23.45<br>(23.72) | 7.83<br>(7.96)   | 85.8                                   |
| K[VO(L1)(L3)] H2O<br>(4)  | C8H13N7SO3VK   | 79%   | 377.32   | 25.46<br>(25.73) | 3.47<br>(3.58) | 25.98<br>(26.24) | 12.72<br>(12.85) | 8.50<br>(8.67)   | 93.2                                   |
| NH4[VO(L1)(L4)]H2O<br>(5) | C8H17N8S2O2V   | 75%   | 372.32   | 25.81<br>(25.98) | 4.60<br>(4.72) | 30.09<br>(30.25) | 8.59<br>(8.69)   | 17.22<br>(17.35) | 79.2                                   |
| K[VO(L1)(L4)]2 H2O<br>(6) | C8H15N7S2O3VK  | 70%   | 411.39   | 23.35<br>(23.45) | 3.67<br>(3.82) | 23.83<br>(23.95) | 11.67            | 15.59<br>15.76   | 75.6                                   |

Table S2: IR Spectroscopic data (cm<sup>-1</sup>) of the ligands and their vanadium (V) complexes.

| Compound                                                | NH <sub>2</sub> and<br>H <sub>2</sub> O | SH   | V=O | V-S | V-N | V-O |
|---------------------------------------------------------|-----------------------------------------|------|-----|-----|-----|-----|
| L1                                                      | 3270, 3200                              | 2910 | -   | -   |     | -   |
| NH <sub>4</sub> [VO(L1)(L2)] 2.5H <sub>2</sub> O<br>(1) | 3110<br>3050                            | -    | 980 | 450 | 540 | -   |
| K[VO(L1)(L2)] 1.5H <sub>2</sub> O<br>(2)                | 3280<br>3200                            | -    | 980 | 470 | 550 | -   |
| NH <sub>4</sub> [VO(L1)(L3)] 4H <sub>2</sub> O<br>(3)   | 3405<br>3300                            | -    | 950 | 480 | 540 | 595 |
| K[VO(L1)(L3)] H <sub>2</sub> O<br>(4)                   | 3290<br>3330                            | -    | 960 | 450 | 535 | 590 |
| NH <sub>4</sub> [VO(L1)(L4)] H <sub>2</sub> O<br>(5)    | 3310<br>339                             | -    | 920 | 470 | 550 | -   |
| K[VO(L1)(L4)]2 H <sub>2</sub> O<br>(6)                  | 3300<br>3380                            | -    | 980 | 450 | 530 | -   |



Table S3: bond length and angles for complexes **1-6**.

| Atom ° Atom A° |       |       |       |         | Atom ° Atom A° |       |       |       |         | Atom ° Atom A° |       |       |       |         | Atom ° Atom A° |       |       |       |         |
|----------------|-------|-------|-------|---------|----------------|-------|-------|-------|---------|----------------|-------|-------|-------|---------|----------------|-------|-------|-------|---------|
| 1              |       |       |       |         | 2              |       |       |       |         | 3              |       |       |       |         | 4              |       |       |       |         |
| C(2)           | N(1)  | 1.374 |       |         | C(2)           | N(1)  | 1.323 |       |         | C(2)           | N(1)  | 1.322 | C(2)  | 104.747 | C(2)           | N(1)  | 1.355 |       |         |
| N(3)           | N(1)  | 1.339 | C(2)  | 110.493 | N(3)           | N(1)  | 1.399 | C(2)  | 104.753 | N(3)           | N(1)  | 1.398 | N(1)  | 107.29  | N(3)           | N(1)  | 1.369 | C(2)  | 109.589 |
| N(4)           | C(2)  | 1.418 | N(1)  | 104.652 | N(4)           | C(2)  | 1.383 | N(1)  | 107.186 | N(4)           | C(2)  | 1.38  | N(1)  | 128.106 | N(4)           | C(2)  | 1.476 | N(1)  | 107.237 |
| S(6)           | C(2)  | 1.72  | N(1)  | 132.03  | S(6)           | C(2)  | 1.774 | N(1)  | 127.964 | S(6)           | C(2)  | 1.77  | N(1)  | 105.001 | S(6)           | C(2)  | 1.712 | N(1)  | 134.145 |
| C(5)           | N(3)  | 1.362 | N(1)  | 108.48  | C(5)           | N(3)  | 1.335 | N(1)  | 104.978 | C(5)           | N(3)  | 1.335 | N(3)  | 126.934 | C(5)           | N(3)  | 1.36  | N(1)  | 108.346 |
| N(7)           | C(5)  | 1.435 | N(3)  | 132.507 | N(7)           | C(5)  | 1.385 | N(3)  | 126.954 | N(7)           | C(5)  | 1.384 | C(2)  | 119.106 | N(7)           | C(5)  | 1.442 | N(3)  | 135.139 |
| N(8)           | N(4)  | 1.473 | C(2)  | 122.842 | N(8)           | N(4)  | 1.337 | C(2)  | 119.098 | N(8)           | N(4)  | 1.337 | C(5)  | 116.422 | N(8)           | N(4)  | 1.406 | C(2)  | 116.755 |
| N(9)           | N(7)  | 1.498 | C(5)  | 101.972 | N(9)           | N(7)  | 1.526 | C(5)  | 116.427 | N(9)           | N(7)  | 1.525 | C(2)  | 96.001  | N(9)           | N(7)  | 1.445 | C(5)  | 104.645 |
| H(21)          | N(7)  | 0.997 | C(5)  | 110.849 | V(18)          | S(6)  | 2.491 | C(2)  | 95.23   | V(18)          | S(6)  | 2.5   | S(6)  | 86.912  | V(18)          | S(6)  | 2.556 | C(2)  | 81.922  |
| V(18)          | S(6)  | 2.573 | C(2)  | 71.929  | N(16)          | V(18) | 2.209 | S(6)  | 95.059  | N(16)          | V(18) | 2.237 | S(6)  | 126.561 | N(16)          | V(18) | 1.999 | S(6)  | 77.637  |
| N(16)          | V(18) | 2.049 | S(6)  | 71.569  | O(17)          | V(18) | 2.135 | S(6)  | 137.84  | S(17)          | V(18) | 2.441 | S(6)  | 90.62   | S(17)          | V(18) | 2.317 | S(6)  | 144.738 |
| O(17)          | V(18) | 1.992 | S(6)  | 82.467  | O(19)          | V(18) | 1.909 | S(6)  | 95.72   | O(19)          | V(18) | 1.909 | V(18) | 97.572  | O(19)          | V(18) | 1.592 | S(6)  | 82.371  |
| N(20)          | V(18) | 2.061 | S(6)  | 82.865  | C(12)          | O(17) | 1.366 | V(18) | 111.878 | C(12)          | S(17) | 1.779 | S(17) | 118.962 | C(12)          | S(17) | 1.732 | V(18) | 99.515  |
| O(19)          | V(18) | 1.66  | S(6)  | 156.041 | C(10)          | C(12) | 1.393 | O(17) | 119.149 | C(10)          | C(12) | 1.403 | V(18) | 117.586 | C(10)          | C(12) | 1.392 | S(17) | 121.662 |
| C(12)          | O(17) | 1.296 | V(18) | 112.831 | C(14)          | N(16) | 1.335 | V(18) | 111.42  | C(14)          | N(16) | 1.341 | C(12) | 119.944 | C(14)          | N(16) | 1.39  | V(18) | 121.162 |
| C(10)          | C(12) | 1.425 | O(17) | 122.439 | C(15)          | C(14) | 1.399 | C(12) | 120.106 | C(15)          | C(14) | 1.405 | C(12) | 120.719 | C(15)          | C(14) | 1.416 | C(12) | 119.069 |
| C(14)          | N(16) | 1.364 | V(18) | 112.062 | C(11)          | C(10) | 1.398 | C(12) | 119.699 | C(11)          | C(10) | 1.398 | C(11) | 119.611 | C(11)          | C(10) | 1.399 | C(12) | 119.797 |
| C(15)          | C(14) | 1.417 | C(12) | 120.452 | C(13)          | C(15) | 1.398 | C(14) | 119.7   | H(24)          | C(10) | 1.086 | C(14) | 120.457 | C(13)          | C(15) | 1.394 | C(14) | 119.426 |
| C(11)          | C(10) | 1.375 | C(12) | 119.742 |                |       |       |       |         | C(13)          | C(15) | 1.396 |       |         |                |       |       |       |         |
| C(13)          | C(15) | 1.376 | C(14) | 119.361 |                |       |       |       |         |                |       |       |       |         |                |       |       |       |         |
| 5              |       |       |       |         | 6              |       |       |       |         |                |       |       |       |         |                |       |       |       |         |
| C(2)           | N(1)  | 1.321 |       |         | C(2)           | N(1)  | 1.32  |       |         |                |       |       |       |         |                |       |       |       |         |
| N(3)           | N(1)  | 1.396 | C(2)  | 104.831 | N(3)           | N(1)  | 1.393 | C(2)  | 104.858 |                |       |       |       |         |                |       |       |       |         |
| N(4)           | C(2)  | 1.382 | N(1)  | 107.548 | N(4)           | C(2)  | 1.38  | N(1)  | 107.443 |                |       |       |       |         |                |       |       |       |         |
| S(6)           | C(2)  | 1.769 | N(1)  | 128.111 | S(6)           | C(2)  | 1.763 | N(1)  | 127.538 |                |       |       |       |         |                |       |       |       |         |
| C(5)           | N(3)  | 1.335 | N(1)  | 105.113 | C(5)           | N(3)  | 1.332 | N(1)  | 105.088 |                |       |       |       |         |                |       |       |       |         |
| N(7)           | C(5)  | 1.385 | N(3)  | 126.703 | N(7)           | C(5)  | 1.38  | N(3)  | 126.49  |                |       |       |       |         |                |       |       |       |         |
| N(8)           | N(4)  | 1.334 | C(2)  | 118.653 | N(8)           | N(4)  | 1.339 | C(2)  | 119.747 |                |       |       |       |         |                |       |       |       |         |
| N(9)           | N(7)  | 1.523 | C(5)  | 116.423 | N(9)           | N(7)  | 1.51  | C(5)  | 116.294 |                |       |       |       |         |                |       |       |       |         |
| V(18)          | S(6)  | 2.491 | C(2)  | 95.056  | V(18)          | S(6)  | 2.511 | C(2)  | 97.016  |                |       |       |       |         |                |       |       |       |         |
| N(16)          | V(18) | 2.226 | S(6)  | 102.754 | N(16)          | V(18) | 2.356 | S(6)  | 78.133  |                |       |       |       |         |                |       |       |       |         |
| N(17)          | V(18) | 2.095 | S(6)  | 135.829 | N(17)          | V(18) | 2.064 | S(6)  | 141.658 |                |       |       |       |         |                |       |       |       |         |
| O(19)          | V(18) | 1.909 | S(6)  | 106.207 | O(19)          | V(18) | 1.917 | S(6)  | 82.361  |                |       |       |       |         |                |       |       |       |         |
| C(12)          | N(17) | 1.339 | V(18) | 115.07  | C(12)          | N(17) | 1.34  | V(18) | 118.302 |                |       |       |       |         |                |       |       |       |         |
| C(10)          | C(12) | 1.395 | N(17) | 120.874 | C(10)          | C(12) | 1.394 | N(17) | 120.605 |                |       |       |       |         |                |       |       |       |         |
| C(14)          | N(16) | 1.333 | V(18) | 111.417 | C(14)          | N(16) | 1.338 | V(18) | 108.965 |                |       |       |       |         |                |       |       |       |         |
| C(15)          | C(14) | 1.4   | C(12) | 120.526 | C(15)          | C(14) | 1.399 | C(12) | 120.536 |                |       |       |       |         |                |       |       |       |         |
| C(11)          | C(10) | 1.398 | C(12) | 119.948 | C(11)          | C(10) | 1.398 | C(12) | 119.819 |                |       |       |       |         |                |       |       |       |         |
| C(13)          | C(15) | 1.398 | C(14) | 119.644 | C(13)          | C(15) | 1.397 | C(14) | 119.517 |                |       |       |       |         |                |       |       |       |         |
| N(20)          | C(13) | 6.629 | C(11) | 112.142 |                |       |       |       |         |                |       |       |       |         |                |       |       |       |         |

Table S4: Docking energy scores (kcal/mol) derived from the MOE for investigated complexes **1-6** and reference inhibitors Novobiocin & Naphthyridine

| $\Delta G$   | E_H.B | rmsd | E_Int | Evdw | E_Ele. |
|--------------|-------|------|-------|------|--------|
| PDB ID: 4uro |       |      |       |      |        |

|              |            |   |          |          |          |          |   |           |          |   |          |          |
|--------------|------------|---|----------|----------|----------|----------|---|-----------|----------|---|----------|----------|
| 1            | -4.48689   | ± | 0.40146  | -19.1809 | 4.858089 | -13.5443 | ± | 1.181913  | -12.7061 | ± | 1.965668 | -687.076 |
| 2            | -3.29417   | ± | 0.313169 | -3.2513  | 8.880264 | -14.1657 | ± | 1.125484  | -15.8495 | ± | 2.180657 | -1319.36 |
| 3            | -2.99625   | ± | 5.485056 | 5.744313 | 3.335386 | -16.4849 | ± | 0.709926  | -14.769  | ± | 4.565245 | -1406.31 |
| 4            | -3.77885   | ± | 0.502814 | -8.28987 | 4.481207 | -15.6308 | ± | 1.09749   | -15.1112 | ± | 1.690113 | -1385.86 |
| 5            | -3.09643   | ± | 0.32078  | -1.12529 | 6.064763 | -16.2199 | ± | 0.531064  | -9.92016 | ± | 2.013327 | -1553.17 |
| 6            | -3.01162   | ± | 0.957208 | 17.07411 | 1.859781 | -15.0097 | ± | 1.305734  | -17.9566 | ± | 3.085084 | -1535.74 |
| Nov.         | -7.88632   | ± | 0.914276 | -14.7029 | 1.85983  | -42.9322 | ± | 1.1120143 | -15.6593 | ± | 1.36589  | -63.2072 |
| PDB ID: 1VJY |            |   |          |          |          |          |   |           |          |   |          |          |
| 1            | -3.73004   | ± | 1.11201  | -14.317  | 2.430106 | -9.1911  | ± | 0.91428   | 12.74759 | ± | 2.80534  | -665.783 |
| 2            | -2.38761   | ± | 1.04971  | -16.7793 | 2.787305 | -11.1083 | ± | 0.89209   | 100.7158 | ± | 2.86877  | -1281.68 |
| 3            | -2.9139    | ± | 0.9874   | -16.5177 | 2.396107 | -5.86862 | ± | 0.8699    | 48.14878 | ± | 2.9322   | -1399.13 |
| 4            | -2.25492   | ± | 0.9251   | -17.2917 | 2.679346 | -8.56476 | ± | 0.84771   | 102.8958 | ± | 2.99563  | -1333.25 |
| 5            | -5.0434    | ± | 0.86279  | -18.3904 | 1.318259 | -9.9844  | ± | 0.82552   | -31.7604 | ± | 3.05905  | -1508.34 |
| 6            | -4.128591  | ± | 0.80049  | -14.7752 | 1.370579 | -13.358  | ± | 0.80333   | 131.5203 | ± | 3.12248  | -1499.33 |
| Nap.         | -6.4348282 | ± | 0.06951  | -12.4992 | 1.492011 | -27.236  | ± | 0.70365   | 44.6523  | ± | 1.25634  | -106.36  |

$\Delta G$ .: Free binding energy of the ligand from a given conformer, Int.: Affinity binding energy of hydrogen bond interaction with receptor, H.B.: Hydrogen bonding energy between protein and ligand. Eele: Electrostatic interaction with the receptor, Ewdw: Van der Waals energies between the ligand and the receptor.
